# Supplementary material
Source: HighWire-hosted journal article supplement (http://molpharm.aspetjournals.org/highwire/filestream/76773/field_highwire_adjunct_files/0/supplemental_file_100425.pdf)
Supplement: supplemental_file_100425.pdf [file supplemental_file_100425.pdf]

## SUPPLEMENTAL DATA

### MATERIALS AND METHODS

#### *Rearing of barnacle cypris larvae*

Cypris larvae of *B. improvisus* were produced and reared in a laboratory culture of adult individuals as earlier described with some modifications (Berntsson *et al.* 2000). Cyprids were allowed to settle on plexiglass panels placed in the sea off the west coast of Sweden, in the vicinity of Tjärnö Biological Laboratory (58° 53'N, 11° 08'E). The panels were brought to the laboratory and placed in buckets/aquaria with running seawater and used as brood stock. Adult *B. improvisus* spawn throughout the year when regularly fed with nauplii of *Artemia* sp. When kept at 26°C, the development to cypris larvae takes 6-7 days from the first nauplius stage. The newly moulted cypris larvae were filtered to separate the cyprids from the nauplius larvae using three filters with 340, 200 and 160  $\mu$ m pore size. Cypris larvae were washed to remove algae and detritus.

#### *Cyprid motility assay*

Cyprids were made immobile by using agarose (A-2576 from Sigma-Aldrich, St. Louis, MO, USA). Agarose was dissolved in filtered seawater (FSW) to a final concentration of 2 %, heated and melted and thereafter allowed to cool to just above the gelling temperature. Cyprids were added to a Petri dish that had been marked at the bottom into 8 different area zones. Excessive sea water was thereafter removed and the melted agarose was gently poured into the Petri dish. The cyprid larvae were then incorporated and distributed randomly into the agarose by shaking the dish gently. When the agarose was no longer fluid, 5 ml of FSW was added atop of the agarose layer and thereafter the dishes were left for one hour to allow a steady state to form between cyprid, agarose and FSW. Medetomidine (10 nM), atipamezole (100 nM) or a combination of these ligands were then added and individual cyprid movements were counted as kicks per minute under a stereo microscope. The added concentration of medetomidine was approximately ten-fold above its efficacy in preventing settling as noted in earlier studies (Dahlstrom & Elwing 2006). Approximately 20-30 animals were individually identified by the help of the zones mapped on the bottom of the Petri dishes. In the case of adding medetomidine or atipamezole alone, the numbers of kicks were counted before and after one hour incubation with the ligands. When adding atipamezole and medetomidine in combination, the cyprids were first incubated for 3 hours with atipamezole, whereafter the numbers of kicks were registered. Medetomidine was then added and the cyprids were incubated for another hour, whereafter the kicks were counted again. In a control sample, kicks were counted before and after one hour incubation with water.

### ***Collection of adult barnacles for expression studies***

Cyprids were allowed to settle during the summer on plexiglass panels placed in the sea off the west coast of Sweden, in the vicinity of Kristineberg Marine Research Station (58° 15'N, 11° 27'E). Adult animals were collected in October.

### ***RNA preparation and cDNA synthesis***

For each RNA extraction one adult animal, or 20-30 mg of cyprids (wet weight) corresponding to 600-1000 animals were used. The adult animal was removed from its shell by opening the operculum plates and pulling it out with forceps. The adult tissue or cypris larvae were sonicated in micro-centrifuge tubes on ice at 10 micron amplitude with a Soniprep 150<sup>®</sup> device (MSE, London, UK), in buffer RLT (QIAGEN RNeasy mini kit, Qiagen, Valencia, CA, USA) for 2 x 5 seconds with a 2 min rest in between. To get rid of tissue remnants, the sample was then spun at 13000 rpm for 2 min in a micro-centrifuge. Total RNA was extracted from the supernatant with the QIAGEN RNeasy mini kit according to the manufacturer's instructions. The integrity and purity of RNA was measured both spectrophotometrically and by gel electrophoresis. The RNA was used as template for cDNA synthesis using either the iScript kit (BioRad, Hercules, CA, USA) or SuperscriptIII first strand kit (Invitrogen, Invitrogen Life Technologies Inc., Rockville, MD, USA) according to the manufacturers' protocols.

### ***Preparation of genomic DNA from cyprids***

A batch of 20-30 mg cyprids (wet weight) was sonicated in Elution buffer (E.Z.N.A Blood DNA Kit, Omega Bio-Tek, Norcross, GA, USA) for 2 x 5 seconds and then centrifuged to remove tissue remnants. Genomic DNA was thereafter prepared according to the E.Z.N.A Blood DNA Kit protocol. About 20 µg DNA was obtained per batch.

### ***Strategy for cloning of the *B. improvisus* octopamine receptors***

Fragments of *B. improvisus* octopamine receptor genes were obtained using different approaches (see below). To identify the sequences of the 5' and 3' ends, rapid amplification of cDNA ends (RACE) using the GeneRacer<sup>TM</sup> kit (Invitrogen) was performed. The obtained 5' and 3' sequences were used to design primers for cloning of the full-length receptors, from sequences just upstream of the predicted start methionine codon to just downstream of the stop codon. For amplification of each of the 5' or 3' ends, one initial PCR was run followed by a nested PCR using 1 µl of the first reaction. All PCR reactions contained 5 % DMSO. For PCR with degenerate PCR primers, TruStart<sup>TM</sup>Taq DNA Polymerase (Fermentas Life Sciences, Burlington, Canada) was used. In all other PCR reactions, PfuUltra High-Fidelity DNA polymerase<sup>®</sup> (Stratagene, La Jolla, CA, USA) was used. Fragments obtained with degenerate PCR primers were cloned into pCR4<sup>®</sup>-TOPO<sup>®</sup> (Invitrogen) using the TOPO<sup>®</sup> TA Cloning<sup>®</sup> Kit and sequenced. All other fragments were cloned into pCR<sup>®</sup>4Blunt-TOPO<sup>®</sup> using the Zero Blunt<sup>®</sup> TOPO<sup>®</sup> PCR Cloning Kit for Sequencing (Invitrogen) and sequenced. For PCR primer

sequences and PCR programs, see tables S1 and S2, respectively. The GeneRacer primers are supplied with the kit and their sequences can be found in the GeneRacer<sup>TM</sup> kit manual.

### ***Cloning of the $\alpha$ -like octopamine receptor R0***

To clone the *B. improvisus*  $\alpha$ -like octopamine receptor, PCR primers R0-TM-I and R0-TM-VII, corresponding to regions in TM-I and TM-VII of the known *B. amphitrite* octopamine receptor, were used to amplify a fragment of a putative *B. improvisus* homolog. PCR was run on both genomic DNA (1  $\mu$ g) and cDNA (50 ng) obtained from a pool of approximately 1000 cyprids, using PCR program P1. The resulting fragment was about 1100 bp in size.

The 5' end was amplified by an initial PCR using primer R0-5' together with primer GeneRacer 5' and running PCR program P2. The subsequent nested PCR was run using primer R0-5'\_n together with the GeneRacer 5' nested primer and applying PCR program P3. The 3' end was amplified by an initial PCR using primer R0-3' together with the GeneRacer 3' primer and applying program P4. The subsequent nested PCR was run using primer R0-3'\_n together with the GeneRacer 3' nested primer and applying program P5. Fragments of approximately 1800 bp and 1100 bp were obtained for the 5' and 3' ends, respectively.

To clone the full-length receptor, PCR program P6 was run on both genomic DNA and cDNA using primers R0-fl\_fw and R0-fl\_rev. Fragments of approximately 1500 bp were obtained. Sequence analysis showed that the cloned fragments contained an open reading frame for a receptor of 1470 bp with high similarity to the previously cloned  $\alpha$ -like octopamine receptor from *B. amphitrite*.

### ***Cloning of the $\beta$ -like octopamine receptors R1 and R2***

Molaei *et al.* previously used degenerate primers based on sequences conserved in TM-III and TM-VI of biogenic amine receptors to clone an Oct/Tyr receptor from the grasshopper *Locusta migratoria* (Molaei *et al.* 2005). We used the same primers for running PCR on 1  $\mu$ g genomic DNA from *B. improvisus*. The PCR was run according to the temperature protocol of Molaei *et al.*, except that the denaturing temperature during cycling was 95° C and the annealing temperature was 57° C. Fragments of approximately 800 bp were obtained. Twenty-nine clones were sequenced and 3 different receptor sequences were found. One was identical to the already cloned  $\alpha$ -like receptor of *B. improvisus* and a BLAST search showed that the other two were most similar to  $\beta$ -like octopamine receptors and were named R1 and R2.

The 5' ends of R1 and R2 were amplified by initial PCR reactions using the primer GeneRacer 5' together with primers R1-5' or R2-5'. The PCR program P4 was applied for both reactions. The subsequent nested PCR reactions were run using the GeneRacer 5' nested primer together with primer R1-5'\_n or primer R2-5'\_n. PCR programs P7 and P8 were used for R1 and R2, respectively. Fragments of approximately 1200 bp for R1 and 1100 bp for R2 were obtained. The 3' ends were amplified by initial PCR reactions using primer GeneRacer 3' together with R1-3' or R2-3', applying

PCR program P4. The subsequent nested PCR reactions were run using primer R1-3'\_n or primer R2-3'\_n, together with the GeneRacer 3' nested primer. PCR programs P8 and P7 were used for R1 and R2, respectively. Fragments of about 800 bp for R1 and about 1100 bp for R2 were obtained.

To clone the full-length receptors, PCR was run on both genomic DNA and cDNA using PCR program P9. The primers used were R1-fl\_fw and R1-fl\_rev for R1 and primers R2-fl\_fw and R2-fl\_rev for R2. Fragments of approximately 1500 bp were obtained. Sequence analysis showed that the cloned fragments contained open reading frames for R1 or R2 of 1500 and 1494 bp, respectively.

### ***Cloning of the $\beta$ -like octopamine receptors R3 and R4***

PCR was performed on 1  $\mu$ g genomic DNA with degenerate primers annealing to conserved sequences within TM-VI and TM-VII of biogenic amine receptors. These primers were previously used by Smith *et al.* to clone a serotonin receptor from the nematode *Haemonchus contortus* (Smith *et al.* 2003). PCR was run using PCR program P10. A fragment of approximately 100 bp was obtained. Sequencing of 12 clones revealed three receptor gene fragments. A BLAST search showed that one was most similar to a dopamine receptor whereas the other two were most similar to  $\beta$ -like octopamine receptors. To obtain the sequences of the 5' and 3' ends of the two receptors most similar to  $\beta$ -like octopamine receptors, called R3 and R4, RACE was performed.

The 5' ends of R3 and R4 were amplified by initial PCR reactions using the primer GeneRacer 5' together with primers R3-5' or R4-5'. For both reactions, PCR program P11 was applied. The subsequent nested PCR reactions were run using primer R3-5'\_n or R4-5'\_n together with the GeneRacer 5' nested primer, applying PCR program P12. Fragments of approximately 1400 bp for R3 and 1200 bp for R4 were obtained.

The 3' ends were amplified by initial PCR reactions using the primer GeneRacer 3' together with primers R3-3' and R4-3', applying PCR program P11. The subsequent nested PCR reactions were run using primer R3-3'\_n for R3 and primer R4-3'\_n for R4 together with the GeneRacer 3' nested primer. PCR program P12 was used. Fragments of about 1200 bp for R3 and 750 bp for R4 were obtained.

To clone the full-length receptors, PCR was run on cDNA using PCR program P13. The primers used were R3-fl\_fw and R3-fl\_rev for R3 and primers R4-fl\_fw and R4-fl\_rev for R4. Sequence analysis showed that the cloned fragments contained open reading frames for R3 or R4 of 1071 and 1638 bp, respectively.

### ***Prediction of phosphorylation and glycosylation sites***

Prediction of potential phosphorylation and glycosylation sites in the cloned *B. improvisus* octopamine receptors were made using the NetPhosK and NetNGlyc prediction programs on the CBS prediction servers (<http://www.cbs.dtu.dk/services/>) (Blom *et al.* 2004).

### ***Construction of the 3D octopamine receptor/ligand structure model***

A homology model of the R4 receptor was built based on the turkey  $\beta$ 1-adrenoceptor structure ((Warne *et al.* 2008), pdb id 2vt4) using ICM ([www.molsoft.com](http://www.molsoft.com)). The pairwise sequence alignment was extracted from a manually corrected multiple sequence alignment including the *B. improvisus* receptors and the sequences of several functionally characterized invertebrate and human biogenic amine receptors (Supplementary Figure S1 and Table S4). An octopamine model was introduced and repeatedly relaxed with selected receptor binding pocket side-chains flexible by means of Monte Carlo geometry optimizations in torsion space, using soft van der Waals potentials (4.0 kcal/mole cutoff) and other parameters at default values. Several solutions were used for automatic docking of a small library of compounds (including stereoisomers of octopamine and medetomidine) using ICM ([www.molsoft.com](http://www.molsoft.com), (Abagyan & Totrov 1994)). Residues in the TMs are referred to by residue number and the nomenclature of Ballesteros and Weinstein (Ballesteros & Weinstein 1995).

Octopamine is smaller than cyanopindolol that is present in the  $\beta$ 1-adrenoceptor crystal structure, and the position of the docked octopamine differs from cyanopindolol mainly by leaving a region near TM-VII unoccupied. This region is blocked in the octopamine receptor model by F7.39, corresponding to N7.39 in the  $\beta$ 1-adrenoceptor. In the crystallized  $\beta$ 1- and  $\beta$ 2-adrenoceptor structures (Rosenbaum *et al.* 2007, Rasmussen *et al.* 2007, Cherezov *et al.* 2007, Warne *et al.* 2008), the  $\beta$ -hydroxyl groups of cyanopindolol or carazolol form hydrogen bonds with asparagine N7.39, but corresponding hydrogen bonds cannot form with F7.39 of the octopamine receptor. Instead, two other residues are sufficiently close to potentially form direct hydrogen bonds in two different docking orientations: N3.29 and S3.36. Both positions are conserved within the  $\beta$ -like octopamine receptor group. We chose the model with the ligand hydrogen bonded to the N3.29 position for further analysis since the corresponding position has aliphatic, hydrophobic residues in tyramine receptors (tyramine lacks a hydroxyl group in the  $\beta$ -position).

### ***Phylogenetic analysis of identified *B. improvisus* octopamine receptor clones***

Translated sequences from the CDS of the *B. improvisus* clones R0-R4 were analyzed together with biogenic amine receptors from three insects *D. melanogaster*, *T. castaneum* and *A. mellifera*, the barnacle *B. amphitrite*, the molluscs *A. californica*, *A. kurodai* and *Spisula solidissima* and the crustacean *Daphnia pulex*. For *D. pulex*, the three biogenic amine receptors most similar to octopamine receptors were collected from the pre-release protein predictions available from JGI (Dappu1) (GNO\_656044, GNO\_630044, GNO\_324094). These sequence data were produced by the US Department of Energy Joint Genome Institute <http://www.jgi.doe.gov/> in collaboration with the Daphnia Genomics Consortium <http://daphnia.cgb.indiana.edu> and annotated by Dr. Giuseppe Cazzamali (Department of Biology, University of Copenhagen). No other putative crustacean octopamine receptors have been reported to our knowledge.

In phylogenetic comparisons, two rhodopsin receptors from *D. melanogaster* (Dm\_Rh4 and Dm\_Rh6) were included to act as an outgroup. As the *A. mellifera* OctB3 seemed to be truncated at the C-terminus, thus missing the last TMs, an alternative sequence (ENSAPMP00000022772=Am\_OctB-b), which had a complete C-terminus but a different N-terminus, was also added to the analysis.

Alignments were created with CLUSTALW (1.83) and manually corrected when needed, so that the TMs were aligned correctly. Several alignments were made: an alignment based on full-length sequences, an alignment without N- and C-termini, and alignments in which highly variable regions that were hard to align properly were removed, leaving mainly the TMs.

Phylogenetic trees were built using the maximum likelihood method. Trees were calculated using PhyML with both WAG and PAM options, bootstrap 100, employing the PhyML server 2.4 at <http://atgc.lirmm.fr/phyml/>. For comparison, trees were also generated with neighbour-joining (PHYLP package v. 3.57) or using Bayesian inference of phylogeny (MrBayes, v. 3.1.2), with similar results

To make a phylogenetic analysis based on ligand-interacting residues only, all protein side-chain atoms within 5 Å from octopamine in the R4 receptor homology model were identified using ICM (Molsoft LLC, [www.molsoft.com](http://www.molsoft.com)). Twenty-one binding site residues were selected. The corresponding twenty-one amino acids in functionally characterized biogenic amine receptors were extracted from the multiple sequence alignment created when constructing the octopamine receptor 3D model. Three of these residues, belonging to the EC loop 2, were hard to align properly and were therefore removed. The selection radius was generously set to 5 Å to minimize the risk that binding site residues were excluded. A phylogenetic tree based on the predicted ligand binding pocket of eighteen amino acids was constructed using PhyML with the WAG option. Bovine rhodopsin was used as an outgroup.

### ***Expression of cloned receptors in CHO cells***

The *B. improvisus* receptors were subcloned from pCR<sup>®</sup>4Blunt-TOPO<sup>®</sup> into the XbaI and HindIII sites of the pcDNA3.1(-) expression vector (Invitrogen), and subsequently linearized utilizing the SspI restriction site present in the plasmid. The resulting fragments were purified using the NucleoSpin<sup>®</sup> Extract II kit (Macherey-Nagel, Düren, Germany).

Stable transfections were performed using the commercial FuGENE<sup>®</sup> HD transfection kit (Roche Applied Science, Indianapolis, IN, USA) with slight modifications to the manufacturer's instructions. Briefly, 2 µg of the linearized plasmid were added onto 30-40 % confluent CHO cell cultures in 6-well plates together with 5 µl of FuGENE<sup>®</sup> HD transfection reagent. Water (10 µl) was used instead of plasmid DNA in control reactions. The cells were at this stage cultured in serum- and antibiotic-free  $\alpha$ -MEM medium ( $\alpha$ -Minimum Essential Medium, GIBCO<sup>™</sup>, Invitrogen). Cells were maintained at 37° C in a humidified atmosphere containing 5 % CO<sub>2</sub>. After 24 h recovery in an incubator, the

transfected cell cultures were washed with phosphate-buffered saline (PBS), and fresh  $\alpha$ -MEM supplemented with 26 mM NaHCO<sub>3</sub>, 50 IU/ml penicillin, 50  $\mu$ g/ml streptomycin and 5 % heat-inactivated fetal bovine serum (FBS) was added. Selection of transfected cells was started 48 h after the transfection by adding 800  $\mu$ g/ml of the neomycin analogue G418 (Geneticin<sup>®</sup>) (Sigma-Aldrich).

Once G418-induced cell death was evident in the mock-transfected control cell culture wells, the transfected cell cultures were transferred from the 6-well plates into 75 cm<sup>2</sup> plastic culture flasks containing 20 ml of  $\alpha$ -MEM supplemented with 600  $\mu$ g/ml G418. Cells were grown until 90 % confluent, detached from the culture flasks with 0.25 % trypsin/0.02 % EDTA, centrifuged at 1500 rpm for 5 min at 4° C and suspended into 2 ml of FBS supplemented with 7.5 % DMSO. The resulting cell ampoules were stored frozen in liquid nitrogen until used in experiments. For subsequent experiments, transfected CHO cells were revived from liquid nitrogen and cultured in  $\alpha$ -MEM supplemented with 600  $\mu$ g/ml G418.

### ***Ligands***

Octopamine, tyramine, dopamine and histamine were purchased from Sigma-Aldrich. Medetomidine was purchased from Fermion (Finland) and atipamezole was kindly given as a gift from Fermion. [<sup>3</sup>H]RS79948-197 was from Amersham (Buckinghamshire, UK).

### ***cAMP assay***

The cAMP assay was run according to the LANCE kit instructions (PerkinElmer, Life and analytical sciences, Waltham, MA, USA). Briefly, cells that had grown until confluence or near confluence in 75 cm<sup>2</sup> flasks were detached by adding 6 ml Versene solution (Invitrogen). Thereafter 5 ml PBS was added, cells were spun at 1500 rpm for 3-5 min, washed with 5 ml HBSS and suspended in 1-2 ml stimulation buffer to a density of 600000 cells/ml. Finally, the Lance cAMP antibody was diluted 1/100 in the cell suspension. Stimulation of cAMP production was performed by adding the cell/antibody suspension to different concentrations of ligand in a 96-well plate and incubating for 45 minutes. Then 20  $\mu$ l of detection mix was added and the plate was incubated for 2 h before reading the Lance counts at 615 nm in a Victor 2 instrument (PerkinElmer). In each assay, two concentrations of forskolin alone, 100 nM and 100  $\mu$ M, were used as positive control for adenylyl cyclase stimulation. When dose-response curves with R1, R3 and R4 were generated, the amount of stimulation was normalized against the stimulation obtained with 100 nM forskolin alone. For ligand-induced stimulation of R0, 100 nM forskolin was included in addition to the ligand and the stimulation was calculated as % of the stimulation by 100 nM forskolin alone.

### ***Ca<sup>2+</sup> measurements***

CHO cells expressing R0 receptors and non-transfected control cells were plated on black 96-well polystyrene plates (PerkinElmer). 48 h later, the FLIPR Calcium 4 Assay Kit (Molecular Devices,

Sunnyvale, CA, USA) was reconstituted in Hepes-buffered medium (137 mM NaCl, 5 mM KCl, 1 mM  $\text{CaCl}_2$ , 1.2 mM  $\text{MgCl}_2$ , 0.44 mM  $\text{KH}_2\text{PO}_4$ , 4.2 mM  $\text{NaHCO}_3$ , 10 mM glucose, 2.5 mM probenecid and 20 mM Hepes, pH 7.4. Cell culture medium was removed so that 50  $\mu\text{l}$  was left in each well, 50  $\mu\text{l}$  of the FLIPR medium was added, and the cells were incubated for 60 min at 37 °C. The plate was then placed inside a FlexStation automated fluorescence plate reader (Molecular Devices) and fluorescence was monitored at 37 °C at two wavelengths, 485 nm (excitation) and 525 nm (emission). Each well was measured for 230 s. Agonists were added at 30 s. The experiments were conducted in quadruplicate and repeated 3-5 times. Microsoft Excel was used for data analysis.

### ***[<sup>35</sup>S]GTP $\gamma$ S binding assay***

Experiments were carried out using a MultiScreen Vacuum Manifold system (Millipore, Billerica, MA, USA) with Millipore MultiScreen MSFBN 96-well glass fiber filtration plates. Agonist-induced stimulation of [<sup>35</sup>S]GTP $\gamma$ S binding was measured described previously (Peltonen *et al.* 1998): Membrane suspensions prepared by differential centrifugation of disrupted CHO cells were thawed and 5  $\mu\text{g}$  of membrane protein per sample were added to the reaction buffer (final concentrations: 30  $\mu\text{M}$  ascorbic acid, 25 mM Tris-HCl, 1 mM EDTA, 5 mM  $\text{MgCl}_2$ , 1 mM DTT, 20 mM NaCl, 1  $\mu\text{M}$  GDP and 0.1 nM [<sup>35</sup>S]GTP $\gamma$ S (pH 7.4) at room temperature (RT) in a total volume of 300  $\mu\text{l}$ . The samples were incubated for 30 min at RT with 7-8 dilutions of the agonists. Reactions were terminated by rapid vacuum filtration, filters were rinsed (with ice-cold 20 mM Tris-HCl, 1 mM EDTA, 5 mM  $\text{MgCl}_2$ , pH 7.4) air dried and impregnated with 50  $\mu\text{l}$  of Super Mix scintillation cocktail (PerkinElmer Wallac). The bound radioactivity was determined with a Wallac 1450 Betaplate liquid scintillation counter.

### ***Specific binding of [<sup>3</sup>H]RS79948-197 to R0-expressing CHO cell membranes***

Saturation binding experiments with the  $\alpha_2$ -adrenoceptor antagonist radioligand [<sup>3</sup>H]RS79948-197 were carried out for the octopamine receptor-transfected CHO cells (Fagerholm *et al.* 2004). Briefly, 20  $\mu\text{g}$  of membrane protein were incubated with final concentrations of [<sup>3</sup>H]RS79948-197 ranging from 0.125 to 16 nM in 50 mM K<sup>+</sup>-phosphate buffer (pH 7.4). After 30 min at RT, reactions were terminated using rapid filtration through glass fiber filters (Whatman GF/B). The filters were washed (50 mM Tris-HCl, 10 mM EDTA, pH 7.4), placed into scintillation vials with Optiphase “HiSafe” III (Perkin-Elmer Wallac), and the bound radioactivity was measured in a Wallac 1410 scintillation counter. Non-specific binding was determined with 10  $\mu\text{M}$  phentolamine.

The  $B_{\text{max}}$  and  $K_d$  for R0 were approximately 2.4 pmol/mg membrane protein and 7.3 nM, respectively. The  $B_{\text{max}}$  and  $K_d$  of recombinant human  $\alpha_{2A}$ -adrenoceptors expressed in CHO cells (Pohjanoksa *et al.* 1997), used as positive control, was 5.5 pmol/mg protein and 0.2 nM, respectively. No detectable binding of [<sup>3</sup>H]RS79948-197 was observed for the R1-R4 receptors.



### ***Quantitative real-time PCR analysis of differential gene expression***

Q-PCR primers were preferably placed in regions with little or no sequence variation between the clones of a specific receptor, and when possible, in regions that are not conserved between the different receptor subtypes. For primer information see Table S3. To optimize the Q-PCR, the annealing temperature was initially chosen according to the primer melting temperature. Each Q-PCR reaction contained 50 ng cDNA, 12.5  $\mu$ l iQ SYBR Green supermix (Bio-Rad), and 0.2, 0.5 or 0.8  $\mu$ M primer in a total volume of 25  $\mu$ l. The reaction was run on an iQ5 iCycler (Bio-Rad), using an initial denaturing temperature of 95° C for 30 s, followed by 40 cycles of 95° C for 20 s, an annealing temperature specific for each primer for 20 s and elongation at 72° C for 30 s. After 40 cycles, a melting curve was created to ensure that only one PCR product was obtained and product size was checked by gel electrophoresis. If the sample containing no cDNA (negative control) did not give any product and the melting curves indicated one pure product for the different primer concentrations, this temperature was used. If not, the procedure was repeated at other temperatures until the desired result was obtained (see Table S3 for the used optimized temperatures for each primer pair). The reaction efficiencies ( $E$ ) were determined for each primer and calculated according to the equation:  $E = 10^{(-1/\text{slope})}$ . Efficiencies of 100 $\pm$ 5 % were accepted. The mRNA expression was normalized to actin mRNA levels for each sample and calculated using threshold cycle values ( $C_t$ ) and the equation:  $\text{Ratio (reference/target)} = 2^{CT(\text{reference}) - CT(\text{target})}$ .

Since the now identified five GPCRs from *B. improvisus* have large sequence similarities, experiments were performed to ensure that the primer pairs only amplified the receptor it was designed for. Each primer pair was combined with each of the five receptors' cDNA as template (cloned into a plasmid) and Q-PCR was run. Plasmid concentrations from 0.008 to 25 ng per reaction were used. There was a difference of 10-15 cycles when comparing the specific binding of a primer pair to the receptor cDNA it was designed for, with the binding to the other receptor cDNAs. Thus, all primer pairs were shown to be specific for their target cDNA.

## REFERENCES

- Abagyan, R. and Totrov, M. (1994) Biased probability Monte Carlo conformational searches and electrostatic calculations for peptides and proteins. *J Mol Biol*, **235**, 983-1002.
- Ballesteros, J. A. and Weinstein, H. (1995) Integrated methods for the construction of three-dimensional models and computational probing of structure-function relations in G protein coupled receptors. *Methods Neurosci* **25**, 366–428.
- Berntsson, K. M., Jonsson, P. R., Lejhall, M. and Gatenholm, P. (2000) Analysis of behavioural rejection of micro-textured surfaces and implications for recruitment by the barnacle *Balanus improvisus*. *J Exp Mar Bio Ecol*, **251**, 59-83.

- Blom, N., Sicheritz-Ponten, T., Gupta, R., Gammeltoft, S. and Brunak, S. (2004) Prediction of post-translational glycosylation and phosphorylation of proteins from the amino acid sequence. *Proteomics*, **4**, 1633-1649.
- Cherezov, V., Rosenbaum, D. M., Hanson, M. A. et al. (2007) High-resolution crystal structure of an engineered human beta2-adrenergic G protein-coupled receptor. *Science*, **318**, 1258-1265.
- Dahlstrom, M. and Elwing, H. (2006) Adrenoceptor and other pharmacologically active compounds as putative antifoulants. *Prog Mol Subcell Biol*, **42**, 171-202.
- Fagerholm, V., Philipp, M., Hein, L. and Scheinin, M. (2004) [Ethy1-3H]RS-79948-197 alpha2-adrenoceptor autoradiography validation in alpha2-adrenoceptor knockout mice. *Eur J Pharmacol*, **497**, 301-309.
- Molaei, G., Paluzzi, J. P., Bendena, W. G. and Lange, A. B. (2005) Isolation, cloning, and tissue expression of a putative octopamine/tyramine receptor from locust visceral muscle tissues. *Arch Insect Biochem Physiol*, **59**, 132-149.
- Peltonen, J. M., Pihlavisto, M. and Scheinin, M. (1998) Subtype-specific stimulation of [35S]GTPgammaS binding by recombinant alpha2-adrenoceptors. *Eur J Pharmacol*, **355**, 275-279.
- Pohjanoksa, K., Jansson, C. C., Luomala, K., Marjamäki, A., Savola, J. M. and Scheinin, M. (1997) Alpha2-adrenoceptor regulation of adenylyl cyclase in CHO cells: dependence on receptor density, receptor subtype and current activity of adenylyl cyclase. *Eur J Pharmacol*, **335**, 53-63.
- Rasmussen, S. G., Choi, H. J., Rosenbaum, D. M. et al. (2007) Crystal structure of the human beta2 adrenergic G-protein-coupled receptor. *Nature*, **450**, 383-387.
- Rosenbaum, D. M., Cherezov, V., Hanson, M. A. et al. (2007) GPCR engineering yields high-resolution structural insights into beta2-adrenergic receptor function. *Science*, **318**, 1266-1273.
- Smith, M. W., Borts, T. L., Emkey, R., Cook, C. A., Wiggins, C. J. and Gutierrez, J. A. (2003) Characterization of a novel G-protein coupled receptor from the parasitic nematode *H. contortus* with high affinity for serotonin. *J Neurochem*, **86**, 255-266.
- Warne, T., Serrano-Vega, M. J., Baker, J. G., Moukhametzianov, R., Edwards, P. C., Henderson, R., Leslie, A. G., Tate, C. G. and Schertler, G. F. (2008) Structure of a beta1-adrenergic G-protein-coupled receptor. *Nature*, **454**, 486-491.

# Figure S1

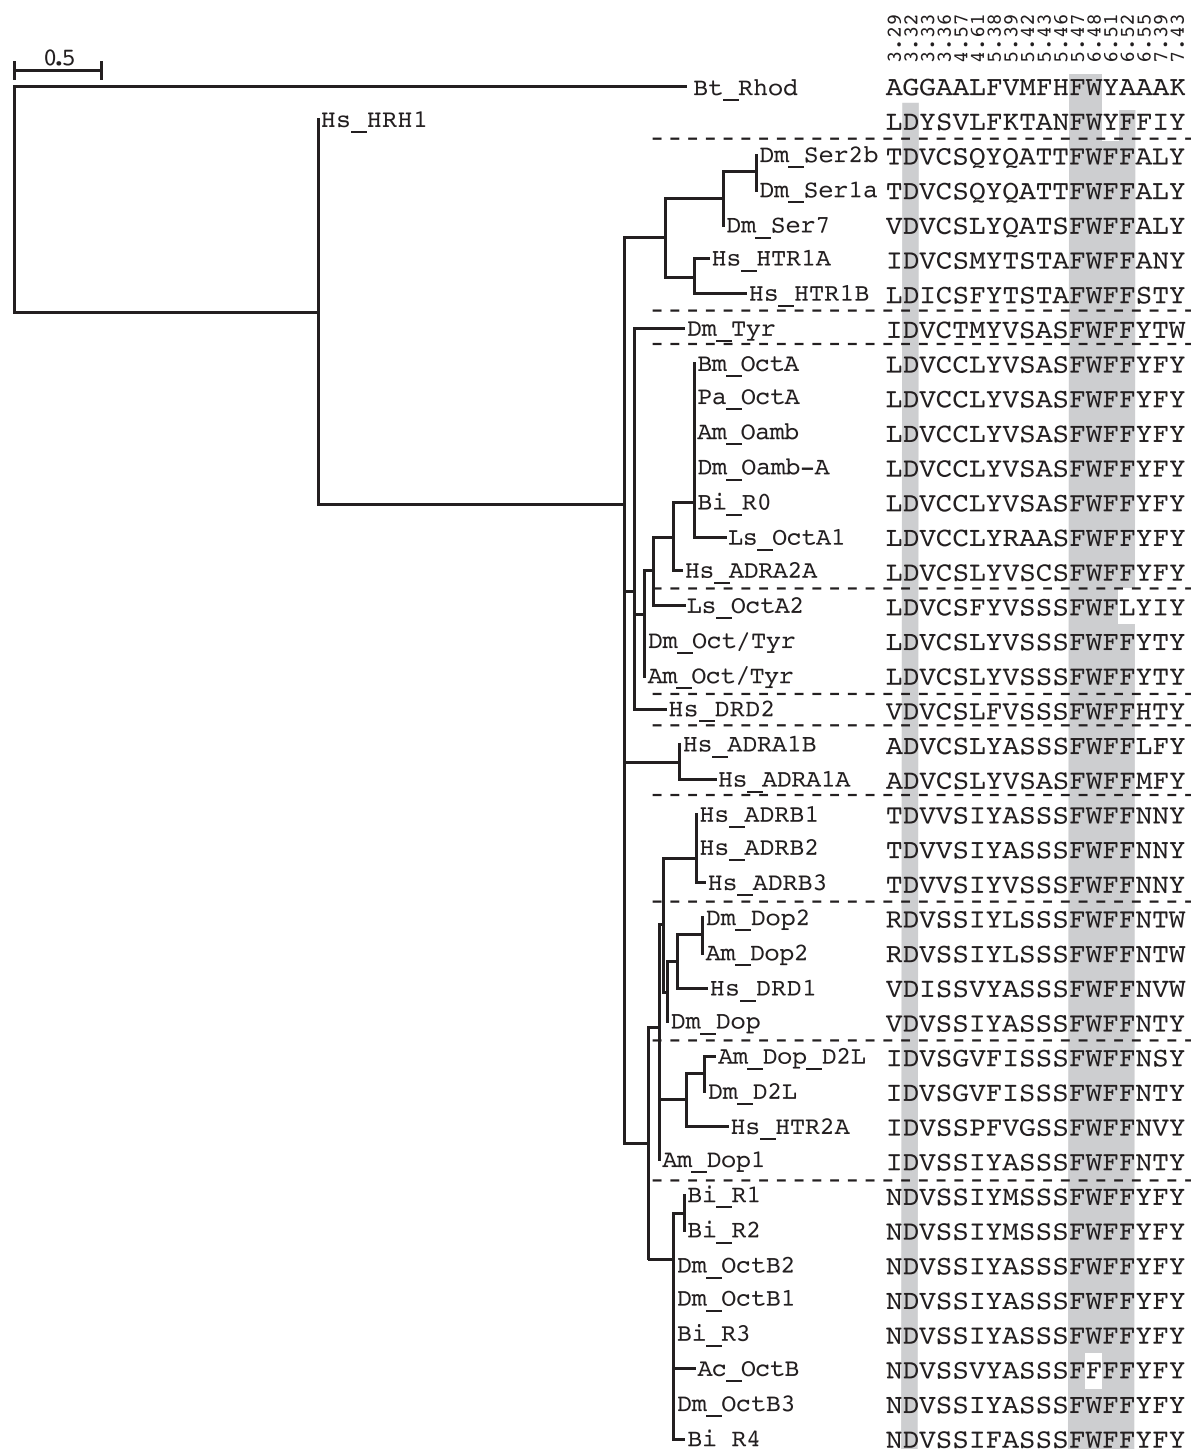

**Figure S1. Phylogenetic tree based on sequence alignments of putative ligand-binding residues in functionally characterized biogenic amine receptors.** A phylogenetic maximum likelihood tree, using PhyML, was built based on 18 putative ligand-binding residues, identified from the 3D model, in selected functionally characterized biogenic amine receptors from the species *B. improvisus* (Bi), *D. melanogaster* (Dm), *A. mellifera* (Am), *A. californica* (Ac), *A. kurodai* (Ak), *L. stagnialis* (Ls), *Periplaneta americana* (Pa) and *Homo sapiens* (Hs). Rhodopsin from *Bos taurus* (Bt) was used as an outgroup. For accession numbers to the used sequences see Table S4. Horizontal lines in the alignment are shown to aid interpretation, and roughly coincide with the sub-family groups. Positions with more than 90 % identity are shaded.

**Table S1. Primers for cloning of the *B. improvisus* octopamine receptors.** Name and sequence for the primers used in cloning of the *B. improvisus* octopamine receptors are shown. All primers are written in the 5' to 3' direction.

| Primer name | Primer sequence            |
|-------------|----------------------------|
| R0-TM-I     | AATTCCGGCAACCTGCTGGTCGTGAT |
| R0-TM-VII   | CTAGCGAGTTGCAGTAGCCCAACCAG |
| R0-5'       | CAGCCAGACGCTGCACCACACGT    |
| R0-5'_n     | GCACGCCAGCGACACGATGAACA    |
| R0-3'       | GGCTGCCGTTCTTCGTGTGCTAC    |
| R0-3'_n     | GCGGCTTCTGCGCCGACTGCGT     |
| R0-fl_fw    | GCTGTGTAGAGCTGTGACTGAC     |
| R0-fl_rev   | GCCGGACTGGACTCCTGCTC       |
| R1-5'       | CCCAGAAAGATGGGCACGAACGAT   |
| R1-5'_n     | GGCCACGGTGCGCTTGTTTCATGT   |
| R1-3'       | CTCCCGCAAGGCGTCGACCAACT    |
| R1-3'_n     | CGCTACTCGACGAGCCAGATGCT    |
| R1-fl_fw    | GGCACTTCTGACTGGAGCTGAT     |
| R1-fl_rev   | CACGTGGGATGAGGTCAGCTC      |
| R2-5'       | CCAGGAAGATCGGCACGAAGGAGAT  |
| R2-5'_n     | CGCCACGGTGCGCTTGTTTCATGT   |
| R2-3'       | GACCTGCGGAAGTCGTCCAACAC    |
| R2-3'_n     | CGTTCTCCACCAGTCACATGCT     |
| R2-fl_fw    | TCACGTGTCCGGCGGACCAT       |
| R2-fl_rev   | CAGCAGCAGCACGAGGTCCTA      |
| R3-5'       | CCACCACGTCTGGGCAGGGACA     |
| R3-5'_n     | CGGCACAGGCTGACCGTGATGTA    |
| R3-3'       | CAGCCTGTGCCGCGAGGCCTGT     |
| R3-3'_n     | GATCGGCTACCTCAACTCGTGTCT   |
| R3-fl_fw    | GTGAAGATGTCTCTCGAGGAAC     |
| R3-fl_rev   | GCCTGGCTTTGCGCGGATTTC      |
| R4-5'       | CCAGAACAGCAGCGACTCCACAAT   |
| R4-5'_n     | GAGTCGCAGAGGCTGACGATGAT    |
| R4-3'       | TCTGGTACATCATCGTCAGCCTCT   |
| R4-3'_n     | GCTGCTGTTCTGGATTGGGTATTTC  |
| R4-fl_fw    | GAGTCGCCGCGCTGATAGTCT      |
| R4-fl_rev   | TGTCGGTACATGGCACCTGAG      |

**Table S2. PCR programs for cloning of the *B. improvisus* octopamine receptors.** The PCR programs used in the RACE reactions and during the cloning of the full-length receptors are displayed. Programs P2, P4 and P11 are touchdown PCRs according to the GeneRacer<sup>TM</sup> kit manual (Invitrogen), where the annealing step of 65° C is excluded in the first ten 10 cycles. The first 5 cycles are run with a combined elongation/annealing step at 72° C, followed by 5 cycles of 70° C. The next 25 cycles are run with an annealing step at 65° C and an elongation temperature of 72° C.

| Program name    | Initial denat. | Denat .     | Annealing                                         | Elong.                         | cycles      | Final elong.  |
|-----------------|----------------|-------------|---------------------------------------------------|--------------------------------|-------------|---------------|
| P1              | 98°C, 2 min    | 98° C, 30 s | 55° C, 30 s                                       | 72° C, 2 min                   | 35          | 72° C, 4 min, |
| P2 (touchdown)  | 98°C, 2 min    | 98° C, 30 s | 65° C, 30 s<br>Excluded in the<br>first 10 cycles | 70° C, 72° C<br>72° C, 2 min   | 35 (5+5+25) | 72° C, 10 min |
| P3              | 98°C, 2 min    | 98° C, 30 s | 65° C, 30 s                                       | 72° C, 2 min                   | 35          | 72° C, 10 min |
| P4 (touchdown)  | 98°C, 2 min    | 98° C, 30s  | 65° C, 30 s<br>Excluded in the<br>first 10 cycles | 70° C, 72° C<br>72° C, 1 min   | 35 (5+5+25) | 72° C, 10 min |
| P5              | 96°C, 2 min    | 96° C, 30 s | 55° C, 30 s                                       | 72° C, 2 min                   | 35          | 72°C, 10 min  |
| P6              | 98°C, 2 min    | 98° C, 30 s | 60° C, 30 s                                       | 72° C, 2 min                   | 35          | 72°C, 10 min  |
| P7              | 98°C, 2 min    | 98° C, 30 s | 62° C, 30 s                                       | 72° C, 2 min                   | 35          | 72°C ,10 min  |
| P8              | 98°C, 2 min    | 98° C, 30 s | 64° C, 30 s                                       | 72° C, 2 min                   | 35          | 72°C ,10 min  |
| P9              | 98°C, 2 min    | 98° C, 30 s | 62° C, 45 s                                       | 72° C, 2 min                   | 35          | 72°C, 10 min  |
| P10             | 95°C, 2 min    | 95° C, 30 s | 48° C, 45 s                                       | 72° C, 1 min                   | 36          | 72°C, 10 min  |
| P11 (touchdown) | 98°C, 2 min    | 98° C, 30s  | 65° C, 30s<br>Excluded in the<br>first 10 cycles  | 70° C, 72° C<br>72° C, 2.5 min | 35 (5+5+25) | 72°C, 10 min  |
| P12             | 98° C, 2 min   | 98° C, 30 s | 62° C, 30 s                                       | 72° C, 2.5 min                 | 35          | 72 °C, 10 min |
| P13             | 98° C ,2 min   | 98° C, 30 s | 59° C, 45 s                                       | 72° C, 2 min                   | 35          | 72° C, 10 min |

**Table S3. Primers for QPCR.** Sequence, concentration, localization and annealing temperature of the primers, as well as amplicon length, are shown. TM=transmembrane region, EC=extracellular loop, IC=intracellular loop.

| Primer pair | Product length bp | Sequence                                             | Location | Annealing temp. °C | Conc. $\mu$ M |
|-------------|-------------------|------------------------------------------------------|----------|--------------------|---------------|
| R0          | 69                | Fw: CGTCACCAACCTGTTTCATCG<br>Re: AACGGCAGCACCAGCATC  | TM2      | 59                 | 0.2           |
| R1          | 86                | Fw GGTGGTACACGTACCAGTC<br>Re: GAGCATGTAGGTGCGATTG    | EC2      | 55                 | 0.5           |
| R2          | 57                | Fw: CCGCTGGCAGTGGTAGTG<br>Re: CGAGAGGGCGTTCAGTAGC    | C-term.  | 56.5               | 0.8           |
| R3          | 80                | Fw: GCCAAGTTCCTCTACAAG<br>Re: TTACGACTCGGCGATATG     | IC3      | 56.5               | 0.8           |
| R4          | 90                | Fw: GCAGATGCTCGTCACGCAAAAC<br>Re: CGGCGGCTGTGAGAGTGC | IC3      | 62                 | 0.5           |
| Actin       | 93                | Fw: CATCAAGATCAAGATCATCGC<br>Re: ATCTGCTGGAAGGTGGAC  | N/A      | 59                 | 0.8           |

Lind, U., Rosenblad M.A., Hasselberg-Frank, L., Falkbring, S., Brive, L., Laurila, J.M., Pohjanoksa, K., Vuorenpää, A., Kukkonen, J.P., Gunnarsson, L., Scheinin, M., Mårtensson Lindblad, L.G.E., Blomberg, A., Octopamine receptors from the barnacle *Balanus improvisus* are activated by the  $\alpha 2$ -adrenoceptor agonist medetomidine, *Molecular Pharmacology*, Mol#63594

**Table S4.**  
Accession numbers and annotations for the sequences used in the phylogenetic analysis.

| ID         | Accession nr and description                                                                                        |
|------------|---------------------------------------------------------------------------------------------------------------------|
| Tc_OctB3   | XP_974238.2  PREDICTED: similar to Octopamine receptor beta-3R (DmOct-beta-3R) [Tribolium castaneum]                |
| Tc_OctB2   | XP_974214.1  PREDICTED: similar to beta adrenergic receptor [Tribolium castaneum]                                   |
| Tc_OctB1   | XP_974265.1  PREDICTED: similar to GA19956-PA [Tribolium castaneum]                                                 |
| Tc_Oamb    | XP_970007.2  PREDICTED: similar to octopamine receptor [Tribolium castaneum]                                        |
| Tc_Oct/Tyr | XP_970290.1  PREDICTED: similar to monophenolic amine tyramine [Tribolium castaneum]                                |
| Tc_Tyr     | XP_001811970.1  PREDICTED: similar to putative GPCR class a orphan receptor 4 (AGAP004034-PA) [Tribolium castaneum] |
| Tc_Dop2    | XP_972779.2  PREDICTED: similar to dopamine receptor 2 [Tribolium castaneum]                                        |
| Tc_Dop1    | XP_971542.2  PREDICTED: similar to dopamine receptor I [Tribolium castaneum]                                        |
| Tc_Dop     | XP_969037.2  PREDICTED: similar to Dopamine 2-like receptor CG33517-PA [Tribolium castaneum]                        |
| Tc_Ser7    | XP_966577.2  PREDICTED: similar to serotonin receptor 7 [Tribolium castaneum]                                       |
| Tc_Ser-a   | XP_967449.2  PREDICTED: similar to serotonin receptor [Tribolium castaneum]                                         |
| Tc_Ser-b   | XP_972856.2  PREDICTED: similar to putative serotonin receptor [Tribolium castaneum]                                |
| Tc_Ser2a   | XP_972327.1  PREDICTED: similar to putative serotonin 5HT-2a receptor (AGAP002232-PA) [Tribolium castaneum]         |
| Tc_DopEc   | XP_968380.1  PREDICTED: similar to DopEcR CG18314-PA [Tribolium castaneum]                                          |
| Am_OctB3-b | (ENSAPMP00000022772, AMEL2.0.feb.pep )                                                                              |
| Am_OctB3   | XP_397077.3  PREDICTED: similar to Octopamine receptor beta-3R (DmOct-beta-3R) [Apis mellifera]                     |
| Am_OctB2   | XP_396348.3  PREDICTED: similar to Octopamine receptor beta-2 (DmOct-beta-12) [Apis mellifera]                      |
| Am_OctB1   | XP_397139.2  PREDICTED: similar to octopamine receptor 2 CG6919-PA, isoform A [Apis mellifera]                      |
| Am_Oamb    | NP_001011565.1  octopamine receptor [Apis mellifera]                                                                |
| Am_Oct/Tyr | NP_001011594.1  G-protein coupled receptor [Apis mellifera]                                                         |
| Am_Tyr     | XP_394231.2  PREDICTED: putative tyramine receptor [Apis mellifera]                                                 |
| Am_Dop2    | NP_001011567.1  dopamine receptor type D2 [Apis mellifera]                                                          |
| Am_Dop-D2L | NP_001014983.1  D2-like dopamine receptor [Apis mellifera]                                                          |
| Am_Dop1    | NP_001011595.1  dopamine receptor, D1 [Apis mellifera]                                                              |
| Am_Ser2    | XP_394798.1  PREDICTED: similar to Serotonin receptor 2 CG1056-PB, isoform B [Apis mellifera]                       |
| Am_Ser7    | NP_001071289.1  serotonin receptor 7 [Apis mellifera]                                                               |
| Am_Ser4    | XP_393915.3  PREDICTED: similar to SERotonin/octopamine receptor family member (ser-4) [Apis mellifera]             |
| Am_DopEc   | XP_396491.1  PREDICTED: similar to DopEcR CG18314-PA, isoform A isoform 1 [Apis mellifera]                          |
| Dm_Oamb-A  | NP_732541.1  Octopamine receptor in mushroom bodies CG3856-PA, isoform A [Drosophila melanogaster]                  |
| Dm_Oamb-B  | NP_524669.2  Octopamine receptor in mushroom bodies CG3856-PB, isoform B [Drosophila melanogaster]                  |
| Dm_OctB1   | NP_651057.1  octopamine receptor 2 CG6919-PA, isoform A [Drosophila melanogaster]                                   |
| Dm_OctB3   | NP_001034043.1  Octbeta3R CG33959-PD, isoform D [Drosophila melanogaster]                                           |
| Dm_OctB2   | NP_001034049.1  Octbeta2R CG33976-PA [Drosophila melanogaster]                                                      |
| Dm_Oct/Tyr | NP_524419.2  Tyramine receptor CG7485-PA [Drosophila melanogaster]                                                  |
| Dm_Tyr     | NP_650652.1  CG7431 CG7431-PA [Drosophila melanogaster]                                                             |
| Dm_DopEc   | NP_647897.2  DopEcR CG18314-PA, isoform A [Drosophila melanogaster]                                                 |
| Dm_Dop     | NP_477007.1  Dopamine receptor CG9652-PA [Drosophila melanogaster]                                                  |
| Dm_Dop2    | NP_733299.1  Dopamine receptor 2 CG18741-PA, isoform A [Drosophila melanogaster]                                    |
| Dm_Ser7    | NP_524599.1  Serotonin receptor 7 CG12073-PA [Drosophila melanogaster]                                              |
| Dm_Ser2b   | NP_523789.3  Serotonin receptor 1B CG15113-PA [Drosophila melanogaster]                                             |
| Dm_Ser2    | NP_524223.2  Serotonin receptor 2 CG1056-PA, isoform A [Drosophila melanogaster]                                    |
| Dm_Ser1a   | NP_476802.1  Serotonin receptor 1A CG16720-PA, isoform A [Drosophila melanogaster]                                  |
| Bi_R0      | GU074418                                                                                                            |
| Bi_R1      | GU074419                                                                                                            |
| Bi_R2      | GU074420                                                                                                            |
| Bi_R3      | GU074421                                                                                                            |
| Bi_R4      | GU074422                                                                                                            |
| Ac_OctB    | AAF37686.1 AF222978_1 octopamine receptor [Aplysia californica]                                                     |
| Ak_OctB    | AAF28802.1 AF117654_1 octopamine receptor [Aplysia kurodai]                                                         |
| Ss_OctB    | AAL23575.1  putative G-protein coupled receptor [Spisula solidissima]                                               |

continued

Table S4 continued

| ID         | Accession nr and description                                              |
|------------|---------------------------------------------------------------------------|
| Dp_OctA    | GNO_656044 (DappuDraft_42083)                                             |
| Dp_OctB    | GNO_630044 (DappuDraft_23347)                                             |
| Dp_Dop2    | GNO_324094 (DappuDraft_22045)                                             |
| Ba_OctA    | Q93126 GPR9_BALAM Probable G-protein coupled receptor No9                 |
| Ba_Oct/Tyr | Q93127 GPR18_BALAM Probable G-protein coupled receptor No18               |
| Dm_Rh4     | NP_476701.1  Rhodopsin 4 CG9668-PA [Drosophila melanogaster]              |
| Dm_Rh6     | NP_524368.3  Rhodopsin 6 CG5192-PB [Drosophila melanogaster]              |
| Ls_OctA1   | O77408 OAR1_LYMST Octopamine receptor 1 (OA1) [Lymnaea stagnalis]         |
| Ls_OctA2   | O1670 OAR2_LYMST Octopamine receptor 2 (OA2) [Lymnaea stagnalis]          |
| Pa_OctA    | AAP93817.1  octopamine receptor [Periplaneta americana]                   |
| Bm_OctA    | O8JR9 Q08JR9_BOMMO Octopamine receptor [Bombyx mori]                      |
| Dm_D2L     | Q8IS44 DRD2L_DROME Dopamine D2-like receptor [Drosophila melanogaster]    |
| Hs_HTR2A   | P28223 5HT2A_HUMAN 5-hydroxytryptamine receptor 2A                        |
| Hs_HTR1A   | P08908 5HT1A_HUMAN 5-hydroxytryptamine receptor 1A                        |
| Hs_HTR1B   | P28222 5HT1B_HUMAN 5-hydroxytryptamine receptor 1B                        |
| Hs_ADRA2A  | P08913 ADA2A_HUMAN Alpha-2A adrenergic receptor                           |
| Hs_DRD2    | P14416 DRD2_HUMAN D(2) dopamine receptor                                  |
| Hs_ADRA1A  | P35348 ADA1A_HUMAN Alpha-1A adrenergic receptor                           |
| Hs_ADRA1B  | P35368 ADA1B_HUMAN Alpha-1B adrenergic receptor                           |
| Hs_ADRB3   | P13945 ADRB3_HUMAN Beta-3 adrenergic receptor                             |
| Hs_ADRB1   | P08588 ADRB1_HUMAN Beta-1 adrenergic receptor                             |
| Hs_ADRB2   | P07550 ADRB2_HUMAN Beta-2 adrenergic receptor                             |
| Hs_DRD1    | P21728 DRD1_HUMAN D(1A) dopamine receptor                                 |
| Hs_HRH1    | P35367 HRH1_HUMAN Histamine H1 receptor                                   |
| Bt_Rhod    | 1u19_a  Crystal Structure Of Bovine Rhodopsin At 2.2 Angstroms Resolution |



## Structures of employed agonist ligands

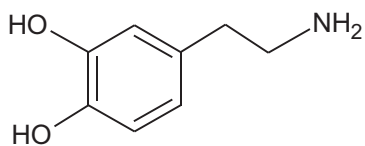

Dopamine

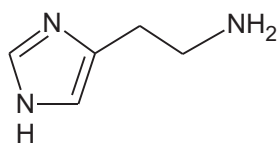

Histamine

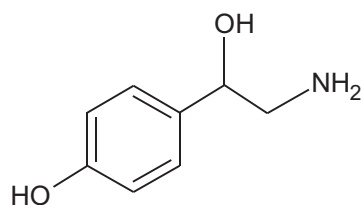

Octopamine

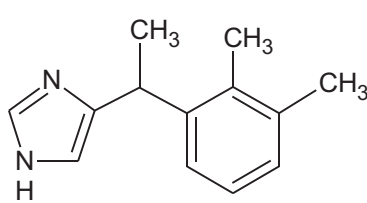

Medetomidine

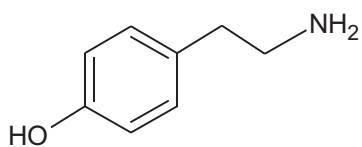

Tyramine
